# Supplementary material for: Sole-Search: an integrated analysis program for peak detection and functional annotation using ChIP-seq data
Source: PubMed Central journal article supplement — Nucleic Acids Res. 2009 Nov 11;38(3):e13. doi: 10.1093/nar/gkp1012 (PMC2817454; doi:10.1093/nar/gkp1012), 2009-11-11
Supplement: gkp1012_1.pdf [file gkp1012_1.pdf]

## **Blahnik: List of supplementary materials**

### 1. Supplementary Figure Legends

### 2. Supplementary Figures and Tables

Table S1: Summary of Solexa eland files

Table S2: TCF4 motif analyses of peaks identified using different programs

Figure S1: Improper mapping of a peak location from ChIP-chip data.

Figure S2: ChIP-seq mapping protocols can result in loss of certain peaks.

Figure S3: ChIP-seq experimental protocols result in non-uniform genomic analyses.

Figure S4: False positive peaks can occur upon analysis of ChIP-seq data.

Figure S5: Input and Output files for Sole-Search, Gff-Overlap, and Location-Analysis

Figure S6: Output files from the Location-Analysis Tool for E2F4

Figure S7: Output files from the Location-Analysis Tool for TCF4

Figure S8. Location Analysis of E2F4 peaks identified using different programs

Figure S9. Illustration of the consequences of removal of individual steps of Sole-search

### Supplementary Data Folders

Supplementary Folder S1: Output files from Sole-search for E2F4 RepA.

Supplementary Folder S2: Output files from Sole-search for E2F4 RepB.

Supplementary Folder S3: Output files from Sole-search for E2F4 merged AB

Supplementary Folder S4: Output files from Sole-search for TCF4 RepA.

Supplementary Folder S5: Output files from Sole-search for TCF4 RepB.

Supplementary Folder S6: Output files from Sole-search for TCF4 merged AB

Supplementary Folder S7: Output files from Overlap-Analysis for E2F4

Supplementary Folder S8: Output files from Overlap-Analysis for TCF4

Supplementary Folder S9: Output files from Location-Analysis for E2F4 merged AB

Supplementary Folder S10: Output files from Location-Analysis for TCF4 merged AB

Supplementary Folder S11: Output files from Sole-search for E2F6 RepA.

Supplementary Folder S12: Output files from Sole-search for E2F6 RepB.

Supplementary Folder S13: Output files from Sole-search for E2F6 merged AB

Supplementary Folder S14: Output files from Location-Analysis for E2F6 merged AB

Supplementary Folder S15: Output files from Overlap-Analysis for E2F4AB vs E2F6AB

Supplementary Folder S16: Output files from Location-Analysis for E2F4E2F6 overlap peaks

Supplementary Folder S17: Distance-Analysis for E2F4E2F6 non-overlapping peaks

Supplementary Folder S18: Output files from Sole-search for YY1\_K562

Supplementary Folder S19: Output files from Sole-search for YY1\_Ntera2

Supplementary Folder S20: Output files from Overlap-Analysis for YY1 K562 vs Ntera2

Supplementary Folder S21: AP2 alpha and TCF4 enhancer analysis
