# Supplementary material for: Sole-Search: an integrated analysis program for peak detection and functional annotation using ChIP-seq data
Source: PubMed Central journal article supplement — Nucleic Acids Res. 2009 Nov 11;38(3):e13. doi: 10.1093/nar/gkp1012 (PMC2817454; doi:10.1093/nar/gkp1012), 2009-11-11
Supplement: gkp1012_7.pdf [file gkp1012_7.pdf]

A

**Input files for Sole-search: Eland\_extended.txt or eland\_results.txt**

**Output files from Sole-search**

- Run statistics and parameters (Summary\_Job.txt)
- Sgr files for visualization of the raw data (rawbinning.sgr)
- Summary: # of peaks, average and median peak height, highest and lowest peak, average peak width (signifpeaks.txt)
- Sgr file of all tags corresponding to called peaks (redbin.sgr)
- Gff file of all peaks, ranked by tag height (signifpeaks.gff)
- Gff file of all peaks, ranked by significance over background (effectsize.gff)
- Sgr files for visualization of the amplified and deleted regions (smear.sgr)
- Gff file of the amplified regions of the genome (duplications.gff)
- Gff file of the deleted regions of the genome (deletions.gff)

B

**Input files for Gff-Overlap Tool**

Peaks files from Sole-search (signifpeaks.gff)

**Output files from Gff-Overlap Tool**

Summary file

Gff file of the overlapping peaks

Gff file of the non-overlapping peaks

Gff file of the union of both peaks files

C

**Input files for Location-Analysis Tool**

Peaks files from Sole-search (signifpeaks.gff)

**Output files from Location-Analysis Tool**

chrom\_count: Hits per chromosome

loc\_analysis: Location analysis

gene\_count: number of binding sites per target gene

dist\_analysis: location of sites with respect to TSS of nearest gene

pos\_info: sites identified as upstream, downstream or within a gene

Intron information: intragenic sites divided into exons and introns
