# Supplementary material for: Sole-Search: an integrated analysis program for peak detection and functional annotation using ChIP-seq data
Source: PubMed Central journal article supplement — Nucleic Acids Res. 2009 Nov 11;38(3):e13. doi: 10.1093/nar/gkp1012 (PMC2817454; doi:10.1093/nar/gkp1012), 2009-11-11
Supplement: gkp1012_12.pdf [file gkp1012_12.pdf]

**Blahnik\_Table S2. TCF4 motif analyses of peaks identified using different programs**

|                                       | SoleSearch | PeakSeq | SissrsBG | SissrsNBG |
|---------------------------------------|------------|---------|----------|-----------|
| # of peaks^^                          | 500        | 500     | 500      | 500       |
| # peaks with TCF4 motif               | 231        | 273     | 90       | 90        |
| % peaks with motif                    | 46%        | 55%     | 18%      | 18%       |
| average peak width                    | 776        | 1,465   | 46       | 46        |
| # background regions with TCF4 motif* | 81         | 127     | 8        | 8         |
| adjusted % of motifs in peaks^        | 30%        | 29%     | 16%      | 16%       |

^^ the top 500 peaks called by each program were used

\*background regions corresponded to regions of the same size as the average peak size (called by each particular program) but located 5 kb upstream of each called peak

^ this value was derived by subtracting the % regions with motifs in background set from the % peaks with motifs.
