# Supplementary figures and images for: Sole-Search: an integrated analysis program for peak detection and functional annotation using ChIP-seq data
Source: PubMed Central journal article supplement — Nucleic Acids Res. 2009 Nov 11;38(3):e13. doi: 10.1093/nar/gkp1012 (PMC2817454; doi:10.1093/nar/gkp1012), 2009-11-11

Blahnik\_Figure S8. Location analysis of E2F4 peaks identified using different programs

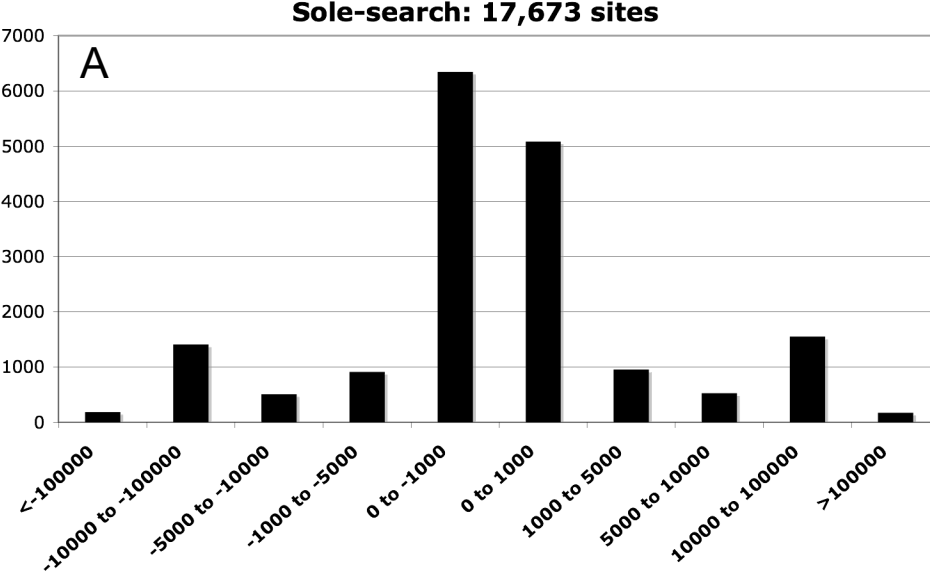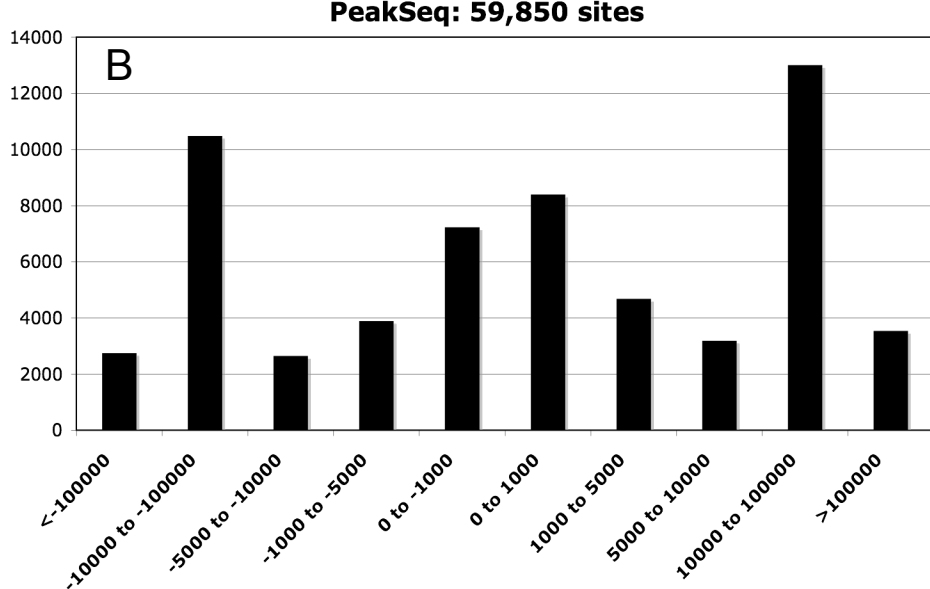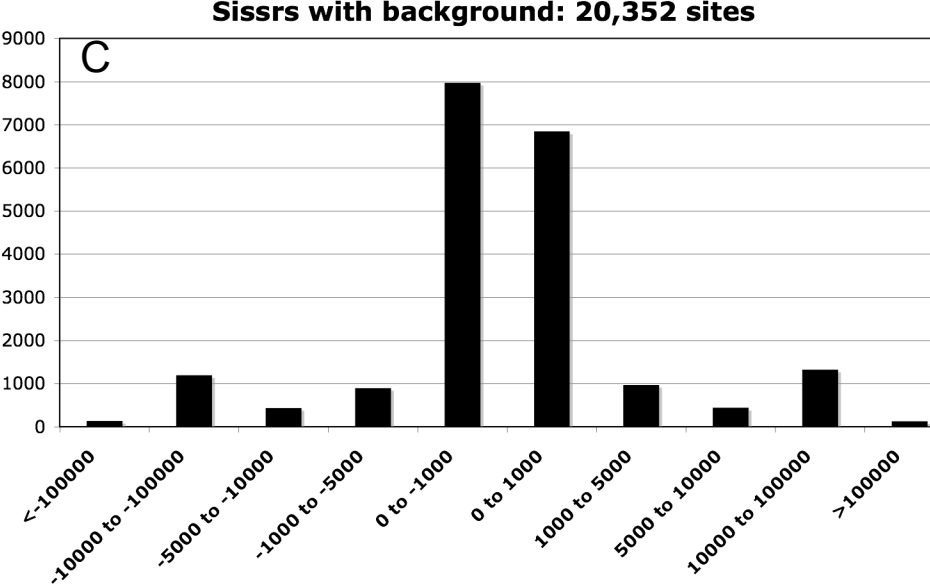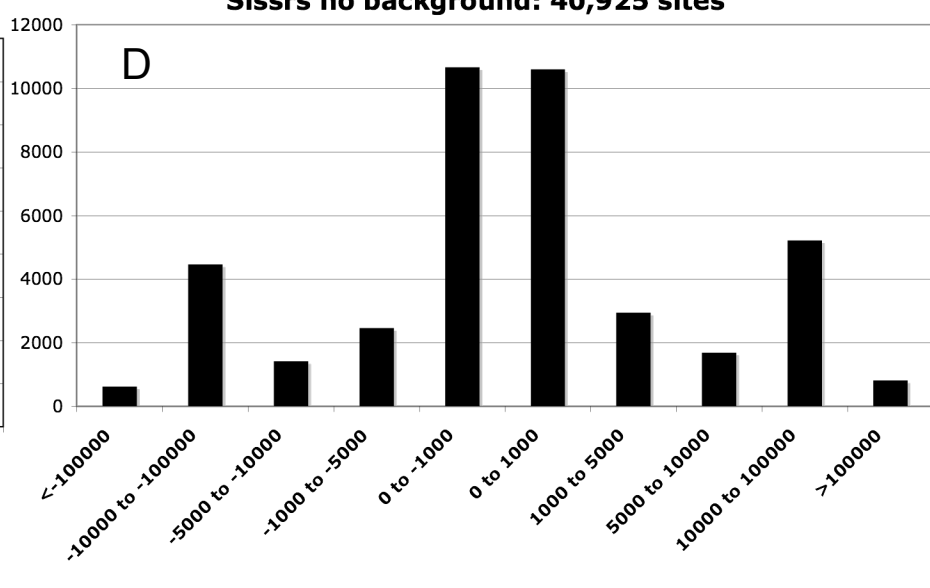

Supplement: gkp1012_10.pdf [file gkp1012_10.pdf]

## Blahnik\_Supplementary\_Figure 9

A

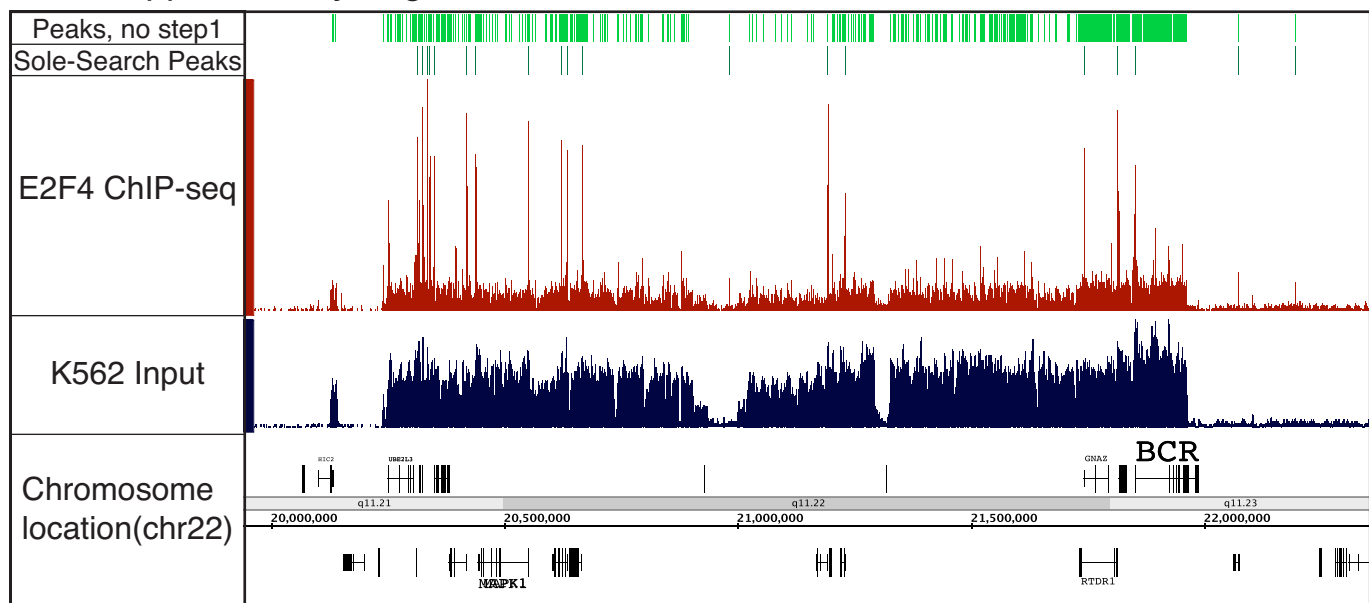

B

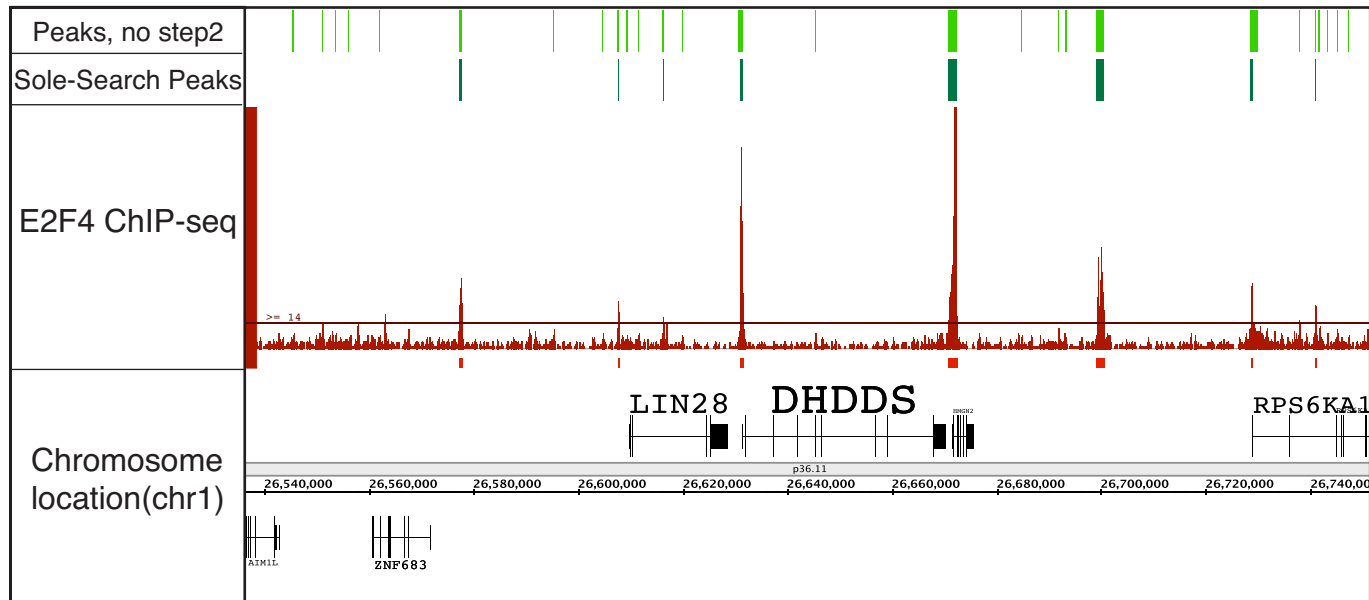

C

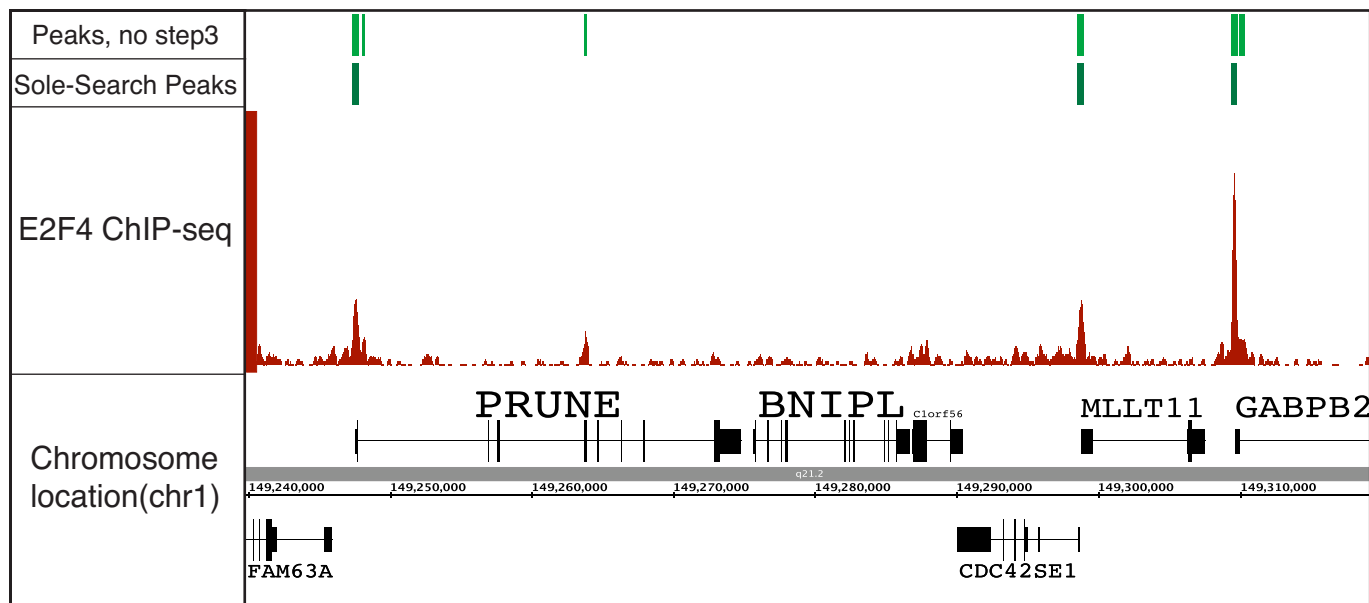

Supplement: gkp1012_11.pdf [file gkp1012_11.pdf]

Blahnik\_Supplementary\_Figure\_S1

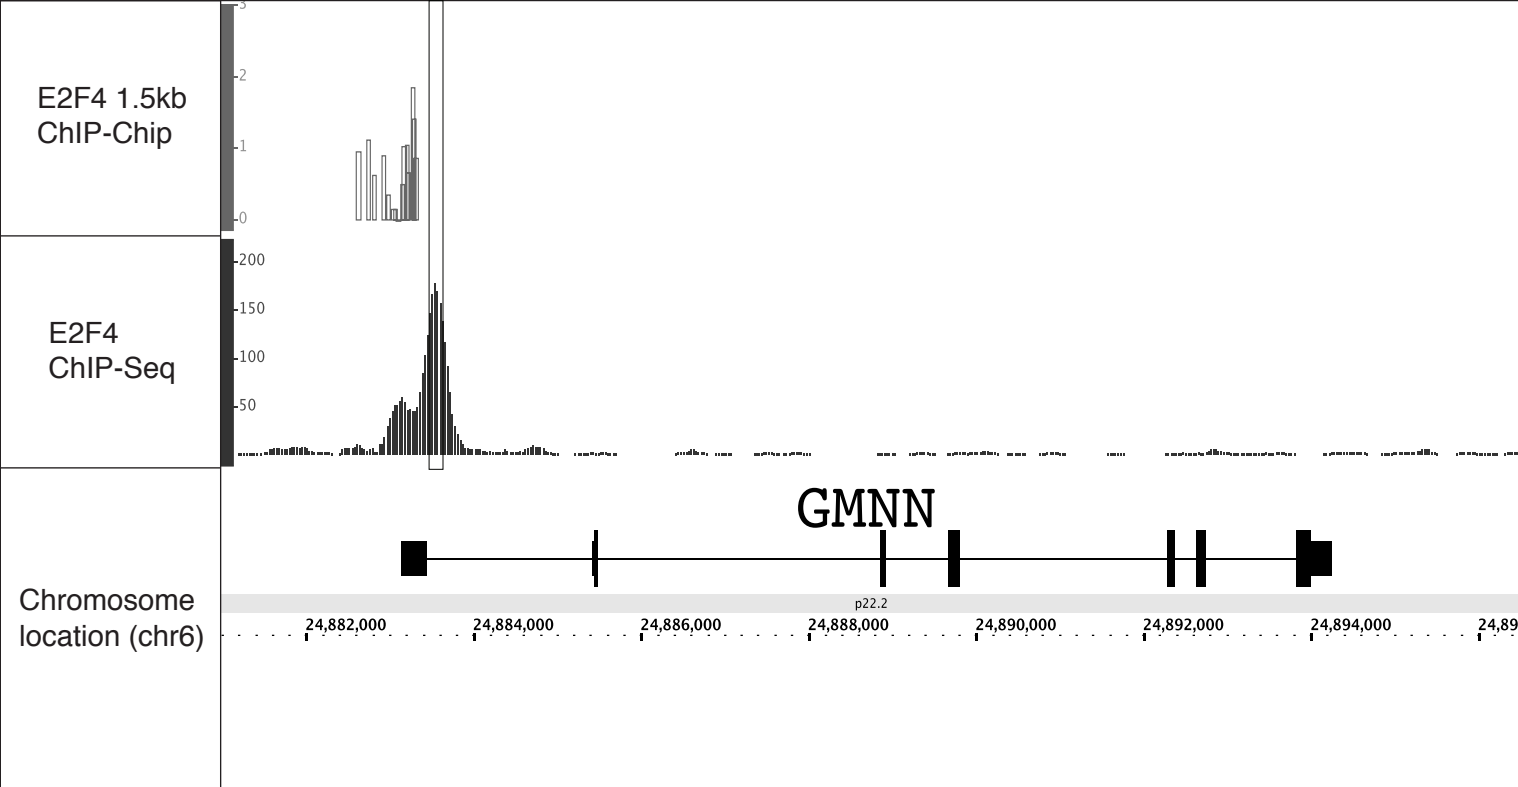

Supplement: gkp1012_3.pdf [file gkp1012_3.pdf]

Blahnik\_Supplementary\_Figure S2

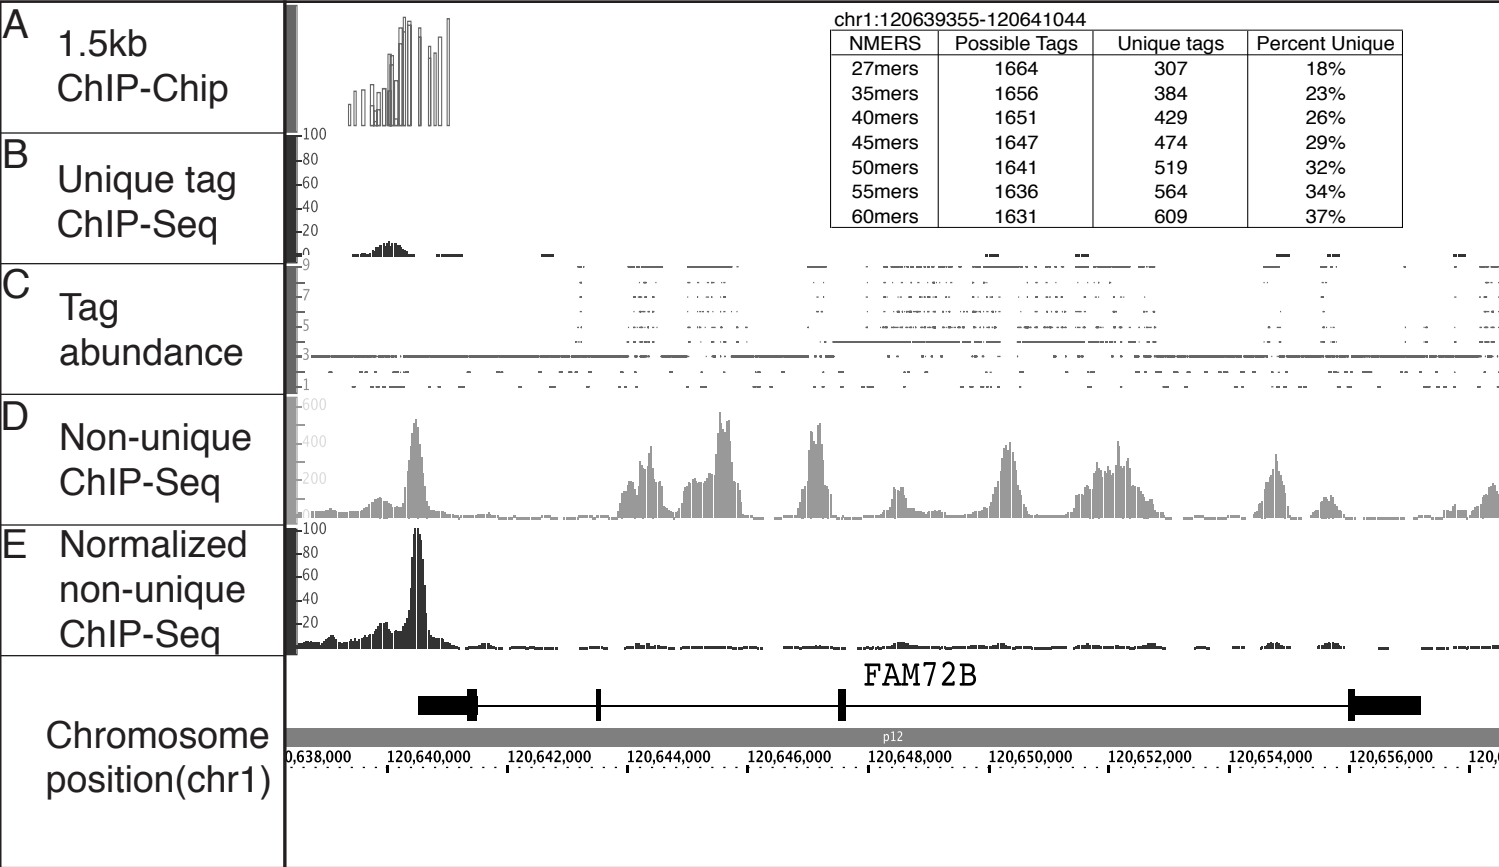

Supplement: gkp1012_4.pdf [file gkp1012_4.pdf]

A

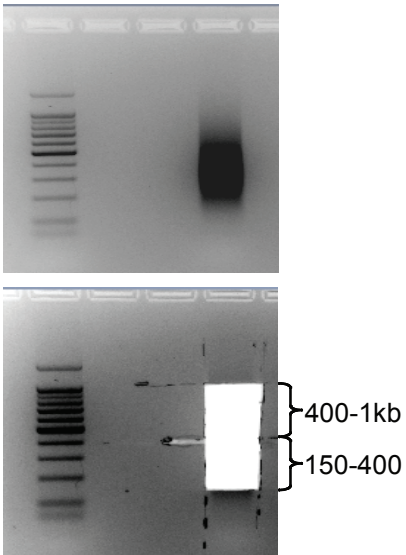

B

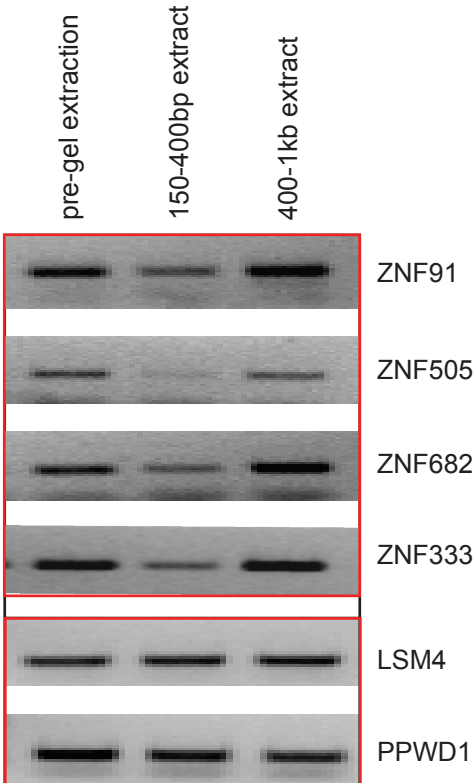

Supplement: gkp1012_5.pdf [file gkp1012_5.pdf]

# Blahnik\_Supplementary Figure S4

A

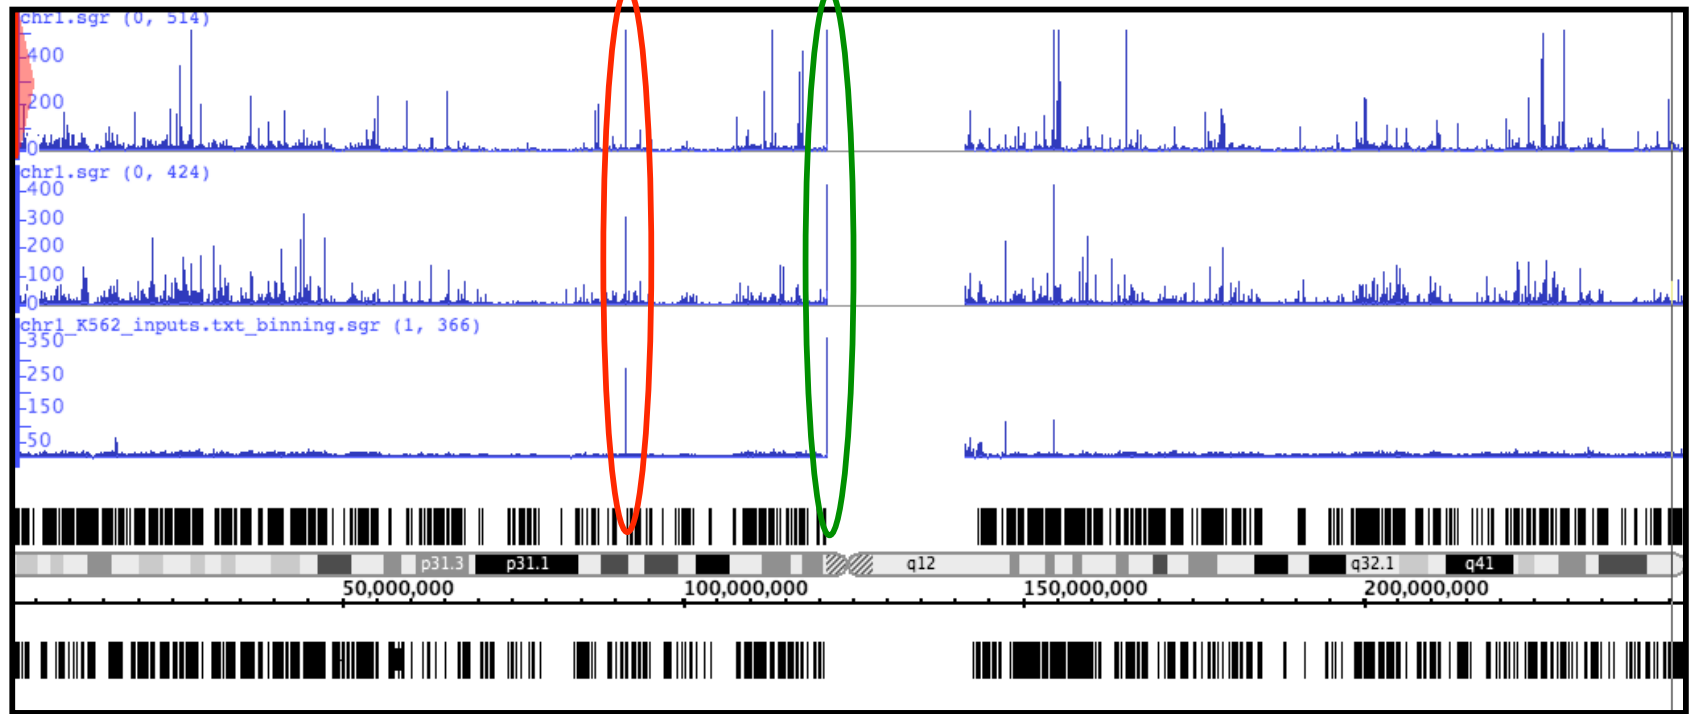

B

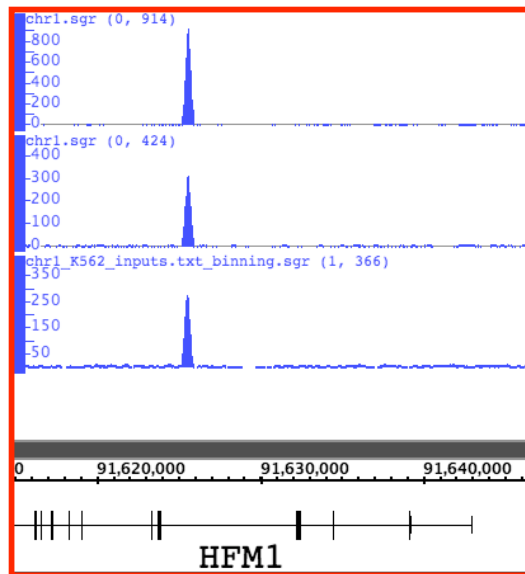

C

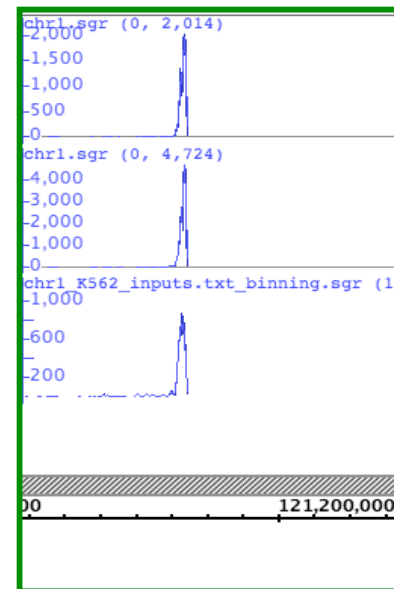

Supplement: gkp1012_6.pdf [file gkp1012_6.pdf]

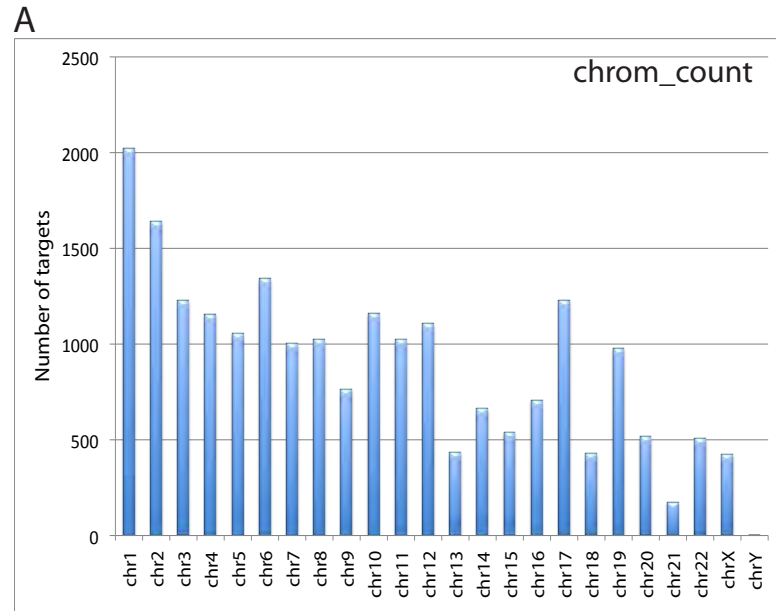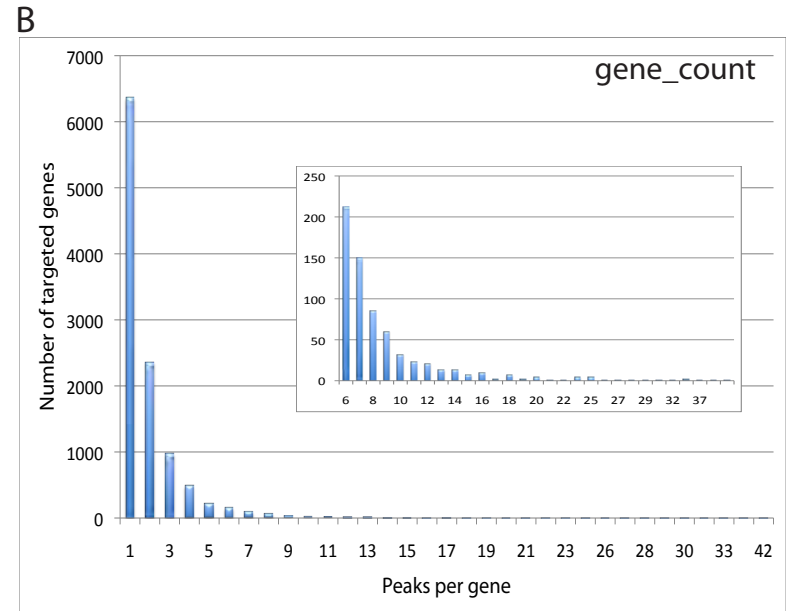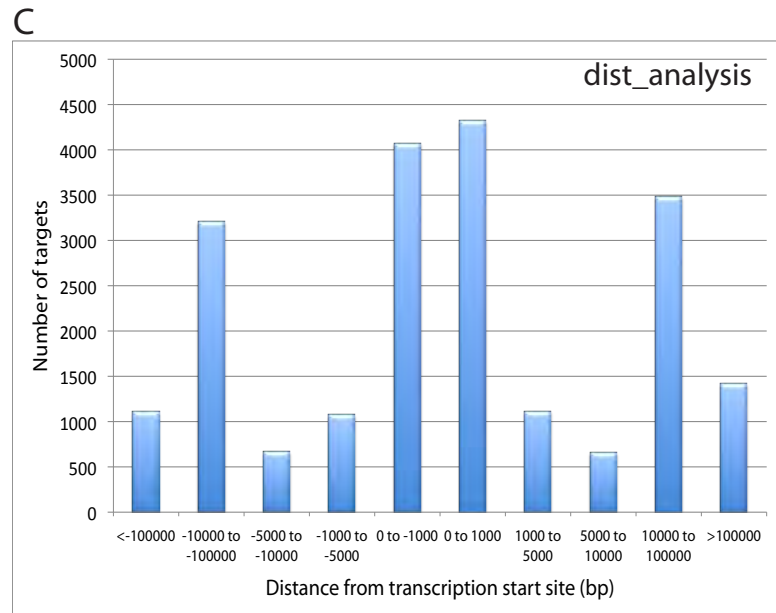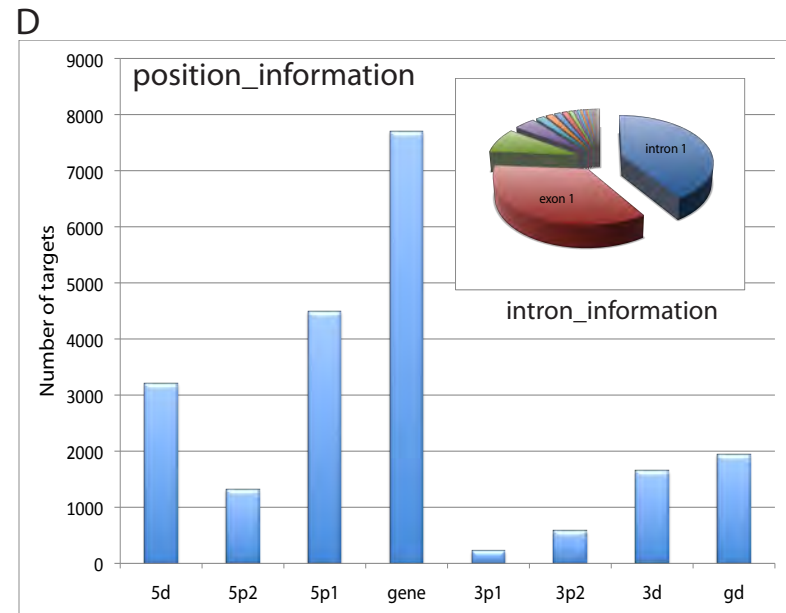

Supplement: gkp1012_9.pdf [file gkp1012_9.pdf]
